# Supplementary material for: Magnesium-enhanced porcine particles using hydrothermal technique improve the osteogenic differentiation of cells
Source: Royal Society of Chemistry journal article supplement (doi:10.1039/d4ra03496a), 2024-01-01
Supplement: d4ra03496a1.pdf [file d4ra03496a1.pdf]

## Supplementary Information

### The manufacture of porcine graft preparation

#### 1.1. Pre-treatment

- 1.1.1. Porcine bone for biomedical (bought from Agricultural Technology Research Institute, Fig. S1A) was put into a pressure pot and distilled water until the volume ratio for porcine bone and water was 1:20.
- 1.1.2. Use the DLAB hot plate stirrer (DLAB MS7-H550-S). Set temperature at 400°C for heating for 4 hours to make oil release.
- 1.1.3. After removing cartilage, connective tissue, and pork, set the temperature at 500°C for heating for 120 hours. (Fig. S1B)
- 1.1.4. A jigsaw cut the Porcine bone in lumps about 6-8 centimeters. (Fig. S1C)

Fig. S1. (A) Porcine bone for biomedical (B) Porcine bone after heated (C) Cut porcine bone

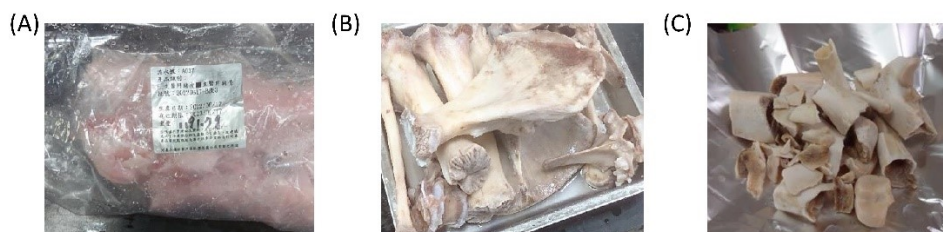

#### 1.2. Acid treatment (Fig. S2A)

- 1.2.1. Immerse porcine bone lumps in hydrochloric acid (0.5N HCl) for 30 minutes to achieve deproteinization, and rinse porcine bone lumps.
  - 1.2.2. Put the porcine bone in hydrogen peroxide (3% H<sub>2</sub>O<sub>2</sub>) for 30 minutes and wash porcine bone.
  - 1.2.3. Dip porcine bone in 75% alcohol for 1 hour.
  - 1.2.4. Use double distilled water(ddH<sub>2</sub>O) to rinse the porcine graft for 12 hours, and repeat this step, until ddH<sub>2</sub>O is clear.
  - 1.2.5. Dry porcine graft at 60°C in the oven (DK-500DT).
- #### 1.3. Calcination (Fig. S2B)
- 1.3.1. Use a high-temperature furnace and set program according to Fig.1c
- #### 1.4. Screening porcine graft to 500-1000µm.

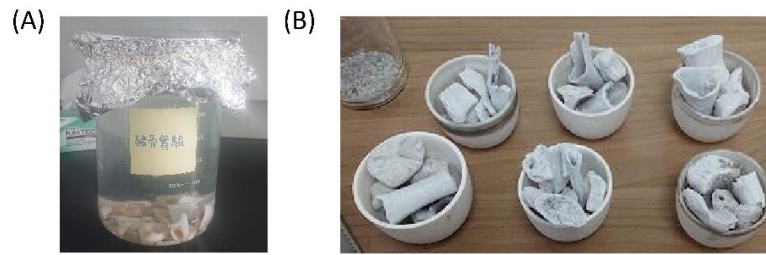

Fig. S2. (A) Porcine bone in acid treatment (B) Porcine bone after calcination

## 2. Hydrothermal treatment

- 2.1. Add 40ml 0.2M sodium hydroxide (NaOH) and put in 50mg/125mg MgO (2mM/5mM) in hydrothermal container.
- 2.2. Put porcine graft in a container, stir, and seal the container
- 2.3. Heat at 150°C for 2 hours, and filter solution.
- 2.4 Dry sample at 60°C in the oven.
